23

24

## Abstract

25 Leishmaniasis, caused by parasites of the genus *Leishmania*, is a disease that effects up to 8  
26 million people worldwide. Parasites are transmitted to human and animal hosts through the  
27 bite of an infected sand fly. Novel strategies for disease control, require a better  
28 understanding of the key step for transmission namely, the establishment of infection inside  
29 the fly. In this work we wanted to identify fly transcriptomic signatures associated with  
30 infection success or failure. We used next generation sequencing to describe the  
31 transcriptome of the sand fly *Phlebotomus papatasi* when fed with blood alone or with blood  
32 containing one of three trypanosomatids: *Leishmania major*, *Leishmania donovani* and  
33 *Herpetomonas muscarum*: a parasite not transmitted to humans. Of these, only *L. major* was  
34 able to successfully establish an infection in *P. papatasi*. However, the transcriptional  
35 signatures observed were not specific to success or failure of infection but a generalised  
36 response to the blood meal. This implies that sand flies perceive *Leishmania* as just a feature  
37 of their microbiome landscape and that any strategy to tackle transmission should focus on  
38 the response towards the blood meal rather than parasite establishment.

39

40

41  
42  
43  
44  
45  
46  
47  
48  
49  
50  
51  
52  
53  
54  
55

## Authors summary

*Leishmania* are parasites that cause leishmaniasis, a group of serious diseases that affect millions of people, mainly across the subtropics and tropics. They are transmitted to humans by phlebotomine sand flies. However, despite establishment in the insect's midgut being key to transmission, early infection events inside the insect are still unclear. Here, we study the gene expression response of the insect vector to a *Leishmania* parasite that is able to establish infection (*L. major*) one that is unable to do so (*L. donovani*) as well as one that is not a natural parasite of sand flies (*Herpetomonas muscarum*). We found that responses following any of the infected blood meals was very similar to uninfected blood meal. However, changes post-blood meal from day 1 to day 9 were dramatic. As a blood feeding insect can accumulate three times its weight in one blood meal, this seems to be the most important physiological change rather than the presence of the parasite. The latter might be just one in a number of microbes the insect encounters. This result will generate new thinking around the concept of stopping transmission by controlling the parasite inside the insect.

56

## Introduction

57 Leishmaniasis, a disease caused by parasites of the genus *Leishmania*, is endemic in 85  
58 territories across the globe - with up to 8 million people affected<sup>1</sup>. Parasites infect vertebrates  
59 through the bite of an infected sand fly vector (Diptera: Phlebotominae). The acute form of  
60 disease, visceral leishmaniasis (VL) or kala-azar, is fatal in 95% of untreated cases and claims  
61 up to 50 thousand lives annually - though non-fatal infections causing dermatological  
62 symptoms are most common<sup>1</sup>. The ongoing VL elimination program in the Indian  
63 subcontinent is proving successful against the most severe clinical forms of VL<sup>2</sup>. However,  
64 elimination of leishmaniasis will likely require a combination of transmission blocking  
65 strategies and novel treatments. This is especially the case in light of reports of resistance to  
66 drugs used to treat human infections<sup>3,4</sup>, as well as pesticides used to control vector  
67 populations<sup>5-7</sup>. But to develop approaches to blocking transmission, we need a better  
68 understanding of the basic biology that underlines the interactions between parasite and  
69 insect vector.

70       The sand fly responses to blood feeding have been investigated with several gene  
71 families shown to be transcribed and/or expressed in response to a blood meal<sup>8</sup>. These  
72 include: digestive enzymes such as trypsins and chymotrypsins, pathogen recognition  
73 molecules and components of the peritrophic matrix – a protective chitinous mesh which  
74 lines the midgut after ingestion<sup>8</sup>. However, few sand fly genes or transcripts specifically  
75 associated with *Leishmania* infection. There is some evidence to suggest *Leishmania* are able  
76 to modify host responses to promote survival and infection establishment. Analysis of cDNAs  
77 isolated from dissected *Phlebotomus papatasi*<sup>9</sup> and *Phlebotomus perniciosus*<sup>10</sup> midguts  
78 revealed that several transcripts which are enriched after receipt of a blood meal are depleted  
79 when flies are fed blood containing *Leishmania*. These included digestive proteases, such as

80 trypsins, as well as peritrophins which are chitin-binding components of the peritrophic  
81 matrix – a protective chitinous mesh which lines the midgut after ingestion<sup>11</sup> and serves as a  
82 temporary barrier to leishmania<sup>12</sup>.

83         Recently, we described both the host<sup>13</sup> and parasite<sup>14</sup> transcriptomes in another  
84 trypanosomatid-insect infection model namely, *Drosophila melanogaster* and its own natural  
85 trypanosomatid parasite *Herpetomonas muscarum*. We showed that parasite feeding  
86 resulted in differential transcription of the two NF- $\kappa$ B pathways Toll and Imd, the dual oxidase  
87 pathway and STAT-dependant epithelial stem cell proliferation. Additionally, we found<sup>14</sup> that  
88 the *H. muscarum* transcriptome during infection closely resembled that reported for *L. major*  
89 during *Phlebotomus duboscqi* infection<sup>15</sup>.

90         Given this, we wished to compare the *Drosophila* responses to those of sand flies  
91 during infection. Common transcriptomic signatures between the two systems would indicate  
92 an evolutionarily conserved response to trypanosomatid infection. Such responses would be  
93 of great interest for the development of broad-spectrum transmission blocking strategies for  
94 trypanosomatid diseases. However, no comparably comprehensive data' is available from  
95 sand flies. As such we sought to describe the sand fly transcriptomic responses to  
96 trypanosomatid infection using next generation sequencing techniques (RNA-seq). Herein,  
97 we describe the transcriptome of *P. papatasi* at three timepoints corresponding to important  
98 stages of trypanosomatid infection; 1 day post blood meal (PBM); following blood meal  
99 digestion and when parasites can be found attached to the midgut epithelium (4 days PBM);  
100 when parasites have migrated anteriorly in the gut and are found in the thoracic midgut and  
101 the stomodeal valve of the fly (9 days PBM, Figure 1)<sup>16</sup>. Infections were done in the context  
102 of both permissive (*Leishmania major*) and refractory (*Leishmania donovani*) infections, as  
103 well as the with monoxenous (infects only insects) trypanosomatid *H. muscarum*, which is not

104 a natural parasite of sand flies. Using this strategy, we hoped to identify host transcriptional  
105 signatures associated with permissive and refractory infection outcomes – in addition to  
106 identifying evolutionarily conserved host responses as described above.

107 Our results indicate that whilst the sand flies' transcriptomic response to blood  
108 feeding is robust and extensive, with the differential regulation of thousands of genes –  
109 there is very little difference between the transcriptomes of blood fed and trypanosomatid  
110 (in blood) fed flies. Blood alone appears to trigger transcription of genes from several immune  
111 pathways – including Imd, Toll and JAK-STAT. Activation of these responses despite the  
112 absence of parasites in the meal may be a pro-active strategy by the sand flies to prevent  
113 infection.

114

## 115 **Results and Discussion**

116

### 117 **Read mapping, *de novo* transcript assembly and differential expression analysis**

118 RNA was purified from sand flies at 1, 4 and 9 days PBM and the resulting reads sequenced  
119 and mapped against the *P. papatasi* genome (Ppap11, vectorbase<sup>17</sup>). The number of reads  
120 generated per sample ranged from 1.08-12.05 million reads with 69.7-79.3% mapping to the  
121 *P. papatasi* genome in each sample (Table S1). Upon visual inspection of read mapping using  
122 IGV<sup>18</sup> it appeared that over 20% of reads were mapping to regions which lacked annotated  
123 features. To include these potentially novel genes in our analysis we assembled *de novo*  
124 concordantly mapped read pairs (from all samples) into 16,025 transcripts. The assembled  
125 transcripts were then merged with the existing annotation of 11,834 transcripts, to give a  
126 final set of 18,592 unique transcripts (see Supplementary data files). This represents  
127 approximately 97.2Mb of *P. papatasi* transcriptome with an average transcript length of

128 4,190 bp. All reads were then counted against the final set of transcripts for differential  
129 expression analysis.

130 Principal component analysis (PCA) showed a high degree of difference between the  
131 fly transcriptomes at day 1 PBM and those at day 4 or 9 PBM (Figure 2) – with transcriptomes  
132 from days 4 and 9 PBM appearing similar. We also note that samples do not clearly group in  
133 accordance with trypanosomatid feeding status.

134

### 135 **Differential expression associated with trypanosomatid presence in the bloodmeal**

136 There are few differentially expressed transcripts which were specifically associated  
137 with trypanosomatids being present in the blood meal (Table S2). We found no significant  
138 difference in transcript abundances between blood-fed and *L. major* fed flies at any time  
139 point. Furthermore, we find in excess of twelve thousand genes for which we reject the  
140 hypotheses that expression has changed by 2-fold or more in either direction in pairwise  
141 comparisons (Wald test) between blood only fed and trypanosomatid fed flies (Table 1).

142 We did however observe differential abundance for some transcripts after *H.*  
143 *muscarum* and *L. donovani* feeding compared to blood only fed control flies. There were  
144 significantly fewer transcripts for the gene PPAI009043, an orthologue to the *D. melanogaster*  
145 signalling protein Rho GTPase activating protein at 54D (RhoGAP54D), in flies fed *H.*  
146 *muscarum* than in blood fed controls at day 1 PBM (log2foldchange 1.13, p-adj < 0.05). The  
147 *Aedes aegypti* and *Anopheles gambiae* RhoGAP54D orthologues are upregulated in blood fed  
148 mosquitos compared to sugar fed controls<sup>19,20</sup>. Given this, and that this response was not  
149 seen after *Leishmania* feeding, this transcriptomic response may be *H. muscarum* specific.  
150 The biological significance of reduced RhoGAP54D transcription in this context remains

151 unclear, however the protein is linked to epithelial morphogenesis during *Drosophila*  
 152 development<sup>21</sup> and so may also play a role in the mature insect gut.

153 In *L. donovani* fed flies there were significantly fewer transcripts for the putative  
 154 transporter TrpA1 (PPAI004036, log2foldchange 2.8, padj < 0.05) versus blood only fed flies  
 155 at 9 days PBM. TrpA1 is more generally associated chemo- and thermo-sensing<sup>22,23</sup> in  
 156 *Drosophila*, however a study by Du *et al.* 2006 links TrpA1 to the expulsion of food-borne  
 157 pathogens by increased defecation and the DUOX pathway (discussed further below)<sup>24</sup>.  
 158 Speculatively, reduction in TrpA1 transcripts after *L. donovani* feeding may hint at  
 159 modification of host defensive pathways to promote survival. We also find significantly more  
 160 CUFF.12679 transcripts (log2-foldchange 16.8, p-adj < 0.05) in *L. donovani* fed flies. This novel  
 161 transcript lacks conserved domains or sequence similarity to known Dipteran gene  
 162 transcripts.

163

| vs.                  | Number of genes which do not significantly change in expression by 2-fold or more in either direction (p<0.05) |            |            |                                      |            |            |                                        |            |            |
|----------------------|----------------------------------------------------------------------------------------------------------------|------------|------------|--------------------------------------|------------|------------|----------------------------------------|------------|------------|
|                      | <i>Leishmania major</i> fed flies                                                                              |            |            | <i>Leishmania donovani</i> fed flies |            |            | <i>Herpetomonas muscarum</i> fed flies |            |            |
|                      | 1 day PBM                                                                                                      | 4 days PBM | 9 days PBM | 1 day PBM                            | 4 days PBM | 9 days PBM | 1 day PBM                              | 4 days PBM | 9 days PBM |
| Blood fed 1 day PBM  | 12586                                                                                                          |            |            | 12797                                |            |            | 11957                                  |            |            |
| Blood fed 4 days PBM |                                                                                                                | 12188      |            |                                      | 12597      |            |                                        | 12356      |            |
| Blood fed 9 days PBM |                                                                                                                |            | 12762      |                                      |            | 12731      |                                        |            | 12634      |

164

165 **Table 1 – Numbers of transcripts which do not significantly change in expression by 2-fold**  
 166 **or more in either direction between blood fed and trypanosomatid fed *P. papatasi***  
 167 **(p<0.05).**



168

169           Direct comparisons between trypanosomatid infections yielded similarly few  
170 differentially expressed transcripts (Table S3). At day 1 PBM the only differentially expressed  
171 transcript between the three infections was that of trypsin 1 (PPAI010956, padj < 0.05) which  
172 was 2-fold enriched in *H. muscarum* fed flies compared to those fed *L. donovani*.

173           After defecation at around 4 days PBM it is thought only parasites able to establish in  
174 the ectoperitrophic space persist to develop mature infection<sup>25</sup>. Despite the differences in the  
175 infection outcome reported in laboratory infections across the three trypanosomatids<sup>16</sup>,  
176 there were few differences in the host transcriptome at this critical time point. Two  
177 transcripts were found to be significantly differentially abundant - one corresponding to the  
178 PPAI000999 gene and the other a novel transcript CUFF.14170. Both transcripts were found  
179 at significantly higher levels (p-adjusted <0.05, log2foldchanges of 4 and 18 respectively) in  
180 *H. muscarum* fed flies compared to those fed *L. donovani*. PPAI000999 encodes a protein  
181 predicted to bind to chitin (GO:0006030, GO:0008061 and smart00494). The novel transcript  
182 CUFF.14170 has no known conserved domains and BLAST searches against Dipteran  
183 sequences did not yield any significant hits.

184           The most variation between the three infections was found at 9 days PBM, where 6  
185 transcripts were differentially expressed between *Leishmania* fed and *H. muscarum* fed flies  
186 (padj < 0.05). Flies fed *L. donovani* had significantly more transcripts for the previously  
187 discussed TrpA1 (PPAI004036), and significantly less for the putative zinc metalloprotease  
188 PPAI010164 and novel transcript CUFF.12679, than those fed *H. muscarum*. Flies fed *L. major*  
189 had significantly more transcripts for the hypothetical protein PPAI002947. Additionally,  
190 feeding with *H. muscarum* resulted in significantly more CUFF.14170 transcripts, a novel

191 transcript from this study which lacks conserved domains, than both *Leishmania* infections  
192 (padj < 0.05).

193 Overall, the above observations suggest that blood feeding status is the major source  
194 of transcriptional variation in these flies and not trypanosomatid infection. As such we further  
195 investigated transcriptomic changes after blood feeding alone in *P. papatasi*.

196

### 197 **The *Phlebotomus papatasi* transcriptome after blood feeding**

198 Ingestion of blood alone was associated with significant changes to the transcriptome. The  
199 transcriptomes at day 1 PBM appeared very different to those at 4 (and 9) days PBM, with  
200 12,289 significantly differentially regulated transcripts (Table S4). However, after defecation  
201 of the blood meal remnants the transcriptome was comparatively stable with 264  
202 differentially regulated transcripts (4 vs. 9 days PBM, Table S5). Due to the large number of  
203 differentially expressed transcripts highlighted by these comparisons we first investigated  
204 transcripts whose log<sub>2</sub> fold change was > 4 in either direction between timepoints. From this  
205 subset we were able to focus our analysis on a number of key genes and pathways which are  
206 discussed further below (Tables S6 and S7).

207

### 208 **Early transcriptomic responses to blood meal ingestion are concerned with digestion, 209 metabolism and immunity**

210 Of the 217 transcripts differentially regulated > 4-fold between 1 and 4 days PBM, 197  
211 transcripts were found to be comparatively enriched at day 1 PBM and 20 were comparatively  
212 enriched at day 4 PBM. Ninety-eight of these transcripts did not contain known conserved  
213 domains.

214           Transcripts for putative and known trypsins were one of the most highly represented  
215 groups differentially regulated between day 1 and day 4 PBM. We observed upregulation of  
216 9 transcripts for putative trypsins and chymotrypsins – including the previously characterised  
217 chymotrypsins 1 (PPAI010833), chymotrypsin 3 (PPAI005023) and trypsin 4  
218 (PPAI010456)<sup>8,11,26</sup>. We also observed upregulation of transcripts which may represent novel  
219 trypsins, based on conserved domains and similarity to other Dipteran trypsin/chymotrypsin  
220 sequences, as they are not included in the current genome annotation (Ppap v1<sup>17</sup>)  
221 (CUFF.11666, CUFF.9493, CUFF.6542) and chymotrypsins (CUFF.15058, CUFF.16005,  
222 CUFF.15086, CUFF.14587, CUFF.12454). In contrast, the transcript putatively encoding for  
223 trypsin 1 (PPAI010956) was shown to be enriched at day 4 PBM compared to the earlier  
224 timepoint. The roles of trypsin and chymotrypsin-like serine proteases during blood digestion  
225 in hematophagous insects are well characterised with expression levels varying according to  
226 type and the time since the last blood meal. Our findings agree with previous work, which  
227 showed upregulation of trypsins 3/4 and chymotrypsin 1 in response to the blood meal, as  
228 well as the decrease of trypsin 1<sup>26</sup>.

229           In addition to the trypsins themselves, five transcripts whose products are predicted  
230 to contain trypsin inhibitor like domains (PPAI003932, PPAI000270, PPAI000272, PPAI000274,  
231 PPAI003557) were also comparatively enriched at day 1 PBM (vs. day 4 PBM). It is possible  
232 the corresponding proteins play roles in the regulation of the trypsin 1 as well as other  
233 trypsins (e.g. trypsin 2), reported to be downregulated after blood feeding<sup>26</sup>.

234           Several transcripts encoding for proteins with predicted serine protease/proteolytic  
235 activity, the sequences of which do not resemble trypsins/chymotrypsins were also  
236 comparatively enriched at day 1 PBM. These included two known genes (PPAI009419,  
237 PPAI009871) and three novel transcripts (CUFF.6132, CUFF.6133, CUFF.16132). Serine

238 proteases are implicated in several other cellular processes including innate immune  
239 signalling – notably in Toll pathway activation<sup>27</sup> and the melanisation response<sup>28</sup>. The  
240 predicted protein for PPAI009419 shares approx. 51% identity with the *Culex*  
241 *quinquefasciatus* CLIPA15 (also known as masquerade) across its sequence. CLIPA proteases  
242 interact with and regulate other CLIPs, and the prophenoloxidases (PPO), involved in the  
243 melanisation response<sup>29,30</sup>. This response produces reactive quinones which then polymerise  
244 to form the dark insoluble pigment melanin. These molecules can encapsulate and isolate  
245 invading pathogens or toxic compounds. They also locally generate high local levels of  
246 cytotoxic reactive oxygen species and prevents gas diffusion, starving the invading pathogen  
247 of oxygen. In addition to the putative CLIPA transcript, four pro-phenoloxidase transcripts are  
248 upregulated early infection (PPO1 - PPAI008831, PPAI010450; PPO2 - PPAI012836,  
249 PPAI012835). These zymogens are the rate limiting enzymes in the production of melanin.  
250 PPO1/2 and CLIPA15 were also upregulated immediately after blood feeding in *Anopheles*  
251 *gambiae*<sup>20</sup> - suggesting this is a conserved response to blood feeding in Dipterans.

252 We also observed differential transcription of another group of proteins reported to  
253 play vital roles in protection against invading pathogens - peritrophins. These core  
254 components of the peritrophic matrix (PM) have been shown to be a major barrier against  
255 infection establishment. Knockdown of Peritrophin 1 (Per1) in *P. papatasi* results in an  
256 approximately 40% increase in *Leishmania major* load at 48 hours after parasite ingestion<sup>31</sup>.  
257 In our study, Per1 transcripts were highly enriched at day 1 PBM (vs. day 4 PBM) with log<sub>2</sub>  
258 fold change of 9.96. Of the 32 annotated peritrophins in the *P. papatasi* genome, 14 were  
259 found to be significantly differentially regulated between days 1 and 4 PBM (Table 2). The  
260 majority of transcripts were comparatively enriched at day 1 PBM, however Per2 and Per28  
261 transcripts were more abundant at later timepoints. Ramalho-Ortigão *et al.* 2007<sup>10</sup> showed

262 that *P. papatasi* peritrophin 1 (Per1) transcripts were enriched in flies fed a blood meal  
263 compared to a sugar meal, whilst peritrophin 2 (Per2) transcripts were comparatively  
264 depleted in blood fed flies. Additionally, the group showed that transcripts for both Per1 and  
265 Per2 were depleted in *L. major* infected flies compared to those fed only blood<sup>11</sup>. Our data  
266 largely agree with these findings. However, transcript levels were not statistically significant  
267 different between trypanosomatid and blood-only fed flies - though we do observe fewer  
268 transcripts for Per2 (PPAI009723) in trypanosomatid-fed flies at day 4 PBM (Figure S1). Other  
269 than Per2, the patterns in peritrophin transcript abundance for trypanosomatid fed flies  
270 resembled those of the blood fed controls.

271           Additionally, transcripts for another chitin-binding protein, PPAI000188, were  
272 significantly more abundant at 4 days PBM than at day 1 PBM. The sequence of PPAI000188  
273 resembles the *Lutzomyia longipalpis* protein ChiBi (EU124616.1<sup>32</sup>, 84% protein sequence  
274 identity). ChiBi was shown to be enriched in *L. longipalpis* fed with blood containing *L.*  
275 *infantum chagasi*<sup>32</sup>. Its upregulation here in *P. papatasi* in the absence of *Leishmania* may  
276 indicate this upregulation is a more general response to blood meal, rather than an infection-  
277 specific response.

278

279

280

281

282

283

284

| Gene name | Gene ID    | Log2fold change | p-value (Benjamini-Hochberg adjusted) |
|-----------|------------|-----------------|---------------------------------------|
| Per1      | PPAI009353 | 9.97            | 2.94E-30                              |
| Per26     | PPAI004431 | 3.79            | 1.48E-02                              |
| Per6      | PPAI001604 | 3.29            | 1.61E-07                              |
| Per10     | PPAI004716 | 2.33            | 1.01E-04                              |
| Per7      | PPAI002253 | 2.33            | 1.26E-03                              |
| Per12     | PPAI001263 | 2.02            | 3.92E-02                              |
| Per11     | PPAI004749 | 2.01            | 4.17E-11                              |
| Per27     | PPAI008214 | 1.84            | 1.57E-02                              |
| Per13     | PPAI004750 | 1.71            | 1.39E-02                              |
| Per8      | PPAI002033 | 1.58            | 8.38E-11                              |
| Per3      | PPAI006556 | 1.49            | 2.39E-06                              |
| Per4      | PPAI006974 | 0.95            | 2.43E-02                              |
| Per28     | PPAI001796 | -1.19           | 1.05E-03                              |
| Per2      | PPAI009723 | -2.28           | 8.53E-07                              |

285

286 **Table 2 – *P. papatasi* peritrophins significantly differentially regulated between 1 and 4**  
287 **days PBM. Positive fold change values indicate enrichment at 1 day PBM and negative**  
288 **values indicate enrichment at day 4.**

289

290 In addition to trypsins, transcripts of several other groups of genes associated with  
291 digestion and nutrient uptake were differentially regulated PBM. Several transcripts for lipid  
292 metabolism associated genes were found to be upregulated at day 1 PBM. In addition, eight  
293 transcripts corresponded to known extracellular carboxylic ester hydrolases (PPAI002323,  
294 PPAI003061, PPAI003086, PPAI005115, PPAI005116, PPAI005680, PPAI009133, PPAI008993).  
295 Similarly, transcripts for a putative sterol transfer protein (PPAI008838), and two paralogous  
296 membrane fatty acid desaturase genes (PPAI008098 and PPAI002108) were shown to be  
297 comparatively enriched at day 1 PBM. One transcript, CUFF.7417, does not correspond to a  
298 known gene, however the transcript showed strong sequence similarity to the extracellular  
299 carboxylic ester hydrolases paralogues PPAI005115 and PPAI005116 mentioned above (90%

300 identity). Additionally, CUFF.7417 is immediately downstream of PPAI005115/6 in the  
301 genome and as such we propose this represents a previously unknown paralogue.

302 Four transcripts coded for proteins with solute carrier domains (cl00456). These  
303 transcripts encode for the two paralogous sodium-coupled monocarboxylate transporters  
304 (SCMTs, PPAI005125 and PPAI007402) and two putative SCMTs (CUFF.14648 and  
305 CUFF.14649). The SCMTs are transmembrane proteins, which move molecules with a single  
306 carboxylate group including pyruvate and lactate, across the plasma membrane in a proton-  
307 dependent manner and are associated with the insect midgut brush boarder<sup>33</sup>.

308 We found two transcripts, CUFF.17209 and CUFF.15972, whose products are  
309 predicted to contain the conserved insect allergen related repeat domain (pfam06757). These  
310 transcript sequences also showed similarity to reported cDNAs for *P. papatasi* microvillar  
311 proteins MVP1 and 2 respectively (>89% identity to mRNA sequences). These proteins were  
312 also found previously to be upregulated in sand flies upon ingestion of a blood meal compared  
313 to sucrose-fed flies<sup>11</sup>. These transcripts could not be assigned to an annotated gene in the  
314 current vector base genome (Ppal1<sup>17</sup>). The function of these proteins is not well understood  
315 though they appear to have a conserved signal peptide at the n-terminus and lack  
316 transmembrane domains.

317 Finally, three olfactory (Or57 - PPAI013155, Or99- PPAI013290 and the putative  
318 protein PPAI002404) and a gustatory receptor orthologous to sweet taste receptors of  
319 *Drosophila* (Gr9 - PPAI010978), were upregulated at day 1 PBM compared to later timepoints.  
320 It is likely these sensory receptors were involved in sensing and acquisition of the blood meal  
321 and subsequent decreases in their transcript abundances, may indicate these sensors were  
322 not required after digestion.

323

324

### 325 **The transcriptome after defecation of the blood meal is comparatively stable**

326         The two later timepoints in this study had similar transcriptomic signatures, with only  
327 six transcripts comparatively enriched >2-fold at 9 days PBM (vs. 4 days). These transcripts  
328 corresponded to two glutamate receptors (PPAI003634, PPAI008275), apoptosis inhibitor  
329 survivin (PPAI002284), two histone methyltransferases (PPAI005539, PPAI005538) and a  
330 mucin (PPAI009152). Mucins have been implicated in the interaction with *Leishmania*  
331 parasites. Given that several immunity-related transcripts (including peritrophins, mucins and  
332 melanization pathway genes) were upregulated, we postulated that upon blood meal  
333 ingestion a general immune response was triggered. As such we investigated the transcription  
334 of the members of the two major innate pathways after a bloodmeal: Toll and  
335 Immunodeficiency (Imd). Both pathways have been shown to play a role in the response to  
336 trypanosomatids<sup>13,34–38</sup>. Furthermore, we also investigated members of the Dual-oxidase  
337 (DUOX) and JAK-STAT pathways, both of which were implicated in *D. melanogaster-H.*  
338 *muscarum* interaction<sup>13</sup>. Differential regulation statistics for these transcripts can be found in  
339 Table S8.

340

### 341 **Blood ingestion alone is associated with increased innate immune gene transcription**

342         In blood-fed flies, transcripts putatively encoding early Toll pathway genes (two Toll  
343 receptors, Spätzle and GGBP3) were found to be significantly enriched at day 1 PBM  
344 compared to days 4/9 PBM (fold change > 2, p-adjusted < 0.05, Figure 3A). An exception to  
345 this was the *spätzle processing enzyme* (SPE) the putative transcript for which is enriched in  
346 the latter two timepoints along with several intracellular Toll pathway components. These  
347 trends were broadly consistent in blood-only fed flies as well as those fed with each of the



348 trypanosomatids. However, only flies fed with blood containing *L. major* or *L. donovani*  
349 promastigotes had significantly higher levels of transcripts encoding Toll pathway inhibitor  
350 Cactus at day-1 PBM compared to day 4 PBM (> 2-fold, p-adj < 0.05). Cactus transcript  
351 abundance was not significantly different between days 1 and 4 PBM in blood only or *H.*  
352 *muscarum* fed flies.

353 A similar pattern emerges for the IMD pathway (Figure 3B). Transcripts for putative  
354 peptidoglycan recognition proteins (PGRPs) were more prevalent at day 1 PBM compared to  
355 later timepoints (Figure 6B). However, only putative PGRP 2 (CUFF.5670) was found to be  
356 statistically significantly enriched (2.23-fold) at day 1 PBM (vs. day 4/9 PBM, p-adj < 0.05). The  
357 transcripts putatively encoding IMD, and several other proteins downstream of IMD in the  
358 pathway were found to be significantly enriched (padj < 0.05) at 4 and 9 days PBM (vs. day 1  
359 PBM), including: DREDD, TAK1 and IKK $\beta$ . We also observed significant enrichment of  
360 transcripts putatively encoding negative regulators of the IMD pathway Caspar, dUSP36,  
361 Trabid at days 4 and 9 PBM (>2 fold, p-adj < 0.05). Interestingly, the IMD transcription factor  
362 Relish was not significantly differentially regulated in blood-only fed flies, however flies fed  
363 blood containing *L. major* or *L. donovani* promastigotes showed enrichment of putative Relish  
364 transcripts at day 1 PBM compared to at 4 and 9 days PBM. As such, whilst there is overall  
365 upregulation of IMD pathway transcription with or without trypanosomatids in the blood  
366 meal, there may be important differences in the expression levels of the innate effectors the  
367 meal regulates when *Leishmania* are present.

368 Both Toll and IMD result in the expression of a suite of antimicrobial peptides.  
369 Transcripts for these immune effectors were not significantly differentially regulated after  
370 blood feeding alone. However, flies fed with blood containing *L. major* or *L. donovani*  
371 promastigotes were found to have significantly more transcripts for the AMP defensin at day

372 1 PBM compared to day 4 PBM (2.3 and 1.75 respective log<sub>2</sub>foldchanges, padj < 0.05). This  
373 was not observed in *H. muscarum* fed flies. Whilst transcript levels for other antimicrobial  
374 peptides did change after trypanosomatid feeding, e.g. we observe elevated transcript levels  
375 for cecropin and attacin in some trypanosomatid infections (Figure 3C), overall these were  
376 not found to be statistically significant changes.

377 In addition to AMP expression, the IMD pathway can also result in the transcription of  
378 the NADPH oxidase, dual-oxidase (DUOX), through interaction of IMD with MEKK1<sup>39</sup>. This  
379 transmembrane protein is responsible for production of ROS in the gut epithelium in response  
380 to microbes. We found that DUOX transcripts were significantly higher at days 4 and 9 PBM  
381 compared to day 1 PBM in all feeding conditions (log<sub>2</sub>foldchange 2.98-3.33, p-adj < 0.05,  
382 Figure 6C) – with no significant difference in DUOX transcript abundance between 4 and 9  
383 days PBM in any infection condition. Similarly, we see significant increases in transcripts for  
384 genes upstream of DUOX across infection conditions including: the transcription factor ATF2,  
385 p38 kinase and MEKK1. As such, induction of DUOX pathway transcription appears to be a  
386 generalised response to blood feeding rather than an infection-specific response.

387

### 388 **The JAK-STAT pathway is also associated with the dipteran response to trypanosomatids**

389 Finally, given the association between the JAK-STAT pathway (Figure 4B), dipteran gut  
390 morphology and immunity<sup>40</sup>, particularly in a trypanosomatid infection context<sup>13</sup>, we also  
391 investigate the transcription of key components of this pathway after blood feeding. We  
392 observed higher abundance of putative Upd1 transcripts at day 1 PBM compared to later  
393 timepoints, however this change was only show to be statistically significant for flies fed with  
394 blood and *L. major* where there was a 2.2-fold enrichment of putative Upd1 transcripts.  
395 Furthermore, putative transcripts for the JAK-STAT transcription factor STAT92E were 2-fold

396 enriched in flies in all infection conditions at the two later time points (vs. 1 day PBM, p-adj <  
397 0.05). We also observed a modest enrichment of transcripts for cytokine Upd2 and the  
398 transmembrane receptor Domeless at days 4 and 9 PBM compared to earlier timepoints (fold  
399 changes 1.19 and 1.74 respectively, p-adj < 0.05). The transcription pattern for signalling  
400 protein hopscotch resembled that of Domeless, however these transcripts were only found  
401 to be statistically significantly enriched in trypanosomatid fed flies (p-adj < 0.05). Together  
402 these observations suggested an increase in JAK-STAT signalling a few days after a blood meal  
403 in *P. papatasi*. Further work to investigate if this signalling translates to changes in gut  
404 homeostasis, such as the increased stem cell proliferation observed in the *Drosophila*-  
405 *Herpetomonas* model, will be important. Currently however, as transcript abundance for  
406 STAT92E is enriched in blood only fed controls this response does not appear to be  
407 trypanosomatid specific.

408

409

### Concluding remarks

410 Given the magnitude of the transcriptomic changes associated with blood feeding  
411 alone, and the little variation between blood meals spiked with trypanosomatids that produce  
412 very different infections we speculate that aforementioned defensive responses are not  
413 infection specific. Such a strong response to the blood meal alone is not surprising given the  
414 additional stresses associated with the hematophagous habit<sup>41</sup>. The high-risk nutrient  
415 attainment method drives the insects to take large volumes of blood at each meal e.g.  
416 mosquitoes and tsetse flies expand up to 3 times their pre-meal size a blood meal<sup>41,42</sup> –  
417 putting enormous mechanical strain on the tissues. In addition to the volume, the content of  
418 their meal presents additional problems: excess water/ions<sup>43</sup>, toxic compounds<sup>44</sup> and  
419 bacterial expansion in response to the rich meal<sup>45,46</sup>. Due to the warm-blooded nature of their



443

444 **Trypanosomatid maintenance.**

445 *L. donovani* (MHOM/ET/2010/GR374), *L. major* LV561 (LRC-L137; MHOM/IL/1967/Jericho-II)  
446 and *H. muscarum*<sup>13</sup> were cultured in M199 medium (Sigma) containing 10% heat-inactivated  
447 foetal bovine serum (FBS, Gibco) supplemented with 1% BME vitamins (Basal Medium Eagle,  
448 Sigma), 2% sterile urine, 250 µg/ml amikacin (Amikin, Bristol-Myers Squibb) at 23°C (*L.*  
449 *donovani*, *L. major*) or 28°C (*H. muscarum*).

450

451 ***Phlebotomus papatasi* infections.**

452 *Leishmania* and *H. muscarum* promastigotes from log-phase cultures (day 3-4 post  
453 inoculation) were resuspended in defibrinated and heat-inactivated rabbit blood  
454 (LabMediaServis) at concentration  $1 \times 10^6$  promastigotes per mL which corresponds to 500-  
455 1000 promastigotes per *P. papatasi* female<sup>25</sup>. Sand fly females (5-9 days old) were infected  
456 by feeding through a chick-skin membrane (BIOPHARM, Czech Republic) on the suspension.  
457 Engorged sand flies were maintained in the same conditions as the colony. Females were  
458 dissected at days 1, 4 and 9 post bloodmeal (PBM).

459

460 **RNA extraction**

461 RNA was extracted from pools of 10 sand flies from each condition and timepoint. Whole flies  
462 were homogenised in 200µL TRIzol Reagent (Thermofisher) before 300ul more TRIzol was  
463 added. The homogenate was mixed and incubated at 4°C for an hour. Debris was then spun  
464 down by centrifugation at 12, 000 xg for 5 mins and the resulting supernatant transferred to  
465 a new tube. To each sample 100 µL of chloroform was added and samples incubated on ice  
466 for 2-3 minutes. The three phases (phenol-chloroform, interphase, and upper aqueous phase)

467 were separated by centrifugation at 12, 000 xg for 15 min at 4°C and the upper phase  
468 containing the RNA was moved to a new tube. Following this RNA extraction proceeded  
469 according to the TRIzol Reagent manufacturers protocol for RNA isolation. This protocol  
470 resulted in approximately 5-6µg of RNA from each batch of 10 flies.

471

#### 472 **Transcriptomic libraries**

473 Poly-A mRNA was purified from total RNA using oligodT magnetic beads and strand-specific  
474 indexed libraries were prepared using the KAPA Stranded RNA-Seq kit followed by ten cycles  
475 of amplification using KAPA HiFi DNA polymerase (KAPA Biosystems). Libraries were  
476 quantified and pooled based on a post-PCR Agilent Bioanalyzer and 75 bp paired-end reads  
477 were generated on the Illumina HiSeq v4 following the manufacturer's standard sequencing  
478 protocols. All raw sequencing reads are available (from the date of pending journal  
479 publication) on the European Nucleotide Archive under study accession number  
480 PRJEB35592.

481

#### 482 **Read mapping and differential expression analysis.**

483 Reads were mapped to *P. papatasi* genome (Ppap1 v1, Vectorbase<sup>17</sup>) using hisat2<sup>52</sup>. Reads  
484 which mapped uniquely and in their proper pair were extracted and used to assemble  
485 transcripts *de novo* with Cufflinks (Tuxedo suite)<sup>53</sup>. The newly assembled transcripts were  
486 combined with the VectorBase transcript assembly to create a new set of transcripts using  
487 CuffMerge. Both the sequences of the assembled transcripts and the new annotation file (.gtf)  
488 are included in the supplementary data files. Reads were then counted against the cufflinks-  
489 generated transcripts using featureCounts<sup>54</sup>. The counts data for the (two) technical

490 replicates for each sample were collapsed prior importing into R for differential expression  
491 analysis (pairwise Wald tests) in DESeq2<sup>55</sup>.

492

493 **Acknowledgements** We thank the staff of the DNA pipelines at Wellcome Sanger Institute  
494 for sequencing and generating sequencing libraries. This work was supported by the  
495 European Commission, Horizon 2020 Infrastructure Infravec2 project (grant agreement No  
496 731060, <https://infravec2.eu>). JS and PV were supported by ERD Funds, project CePaViP  
497 (CZ.02.1.01/16\_019/0000759). MJS and JAC were supported by Wellcome via their core  
498 support for the Wellcome Sanger Institute (WSI) through grant 206194. Work in Oxford was  
499 supported by a Consolidator grant from the European Research Council (310912 Droso-  
500 Parasite, to PL), project grant BB/K003569 from the BBSRC (to PL) and a Wellcome Trust  
501 doctoral scholarship (to MAS).

502

## 503 **References**

- 504 1. Courtenay, O., Peters, N. C., Rogers, M. E. & Bern, C. Combining epidemiology with  
505 basic biology of sand flies, parasites, and hosts to inform leishmaniasis transmission  
506 dynamics and control. *PLoS Pathog.* **13**, e1006571 (2017).
- 507 2. Sundar, S., Singh, O. P. & Chakravarty, J. Visceral leishmaniasis elimination targets in  
508 India, strategies for preventing resurgence. *Expert Rev. Anti. Infect. Ther.* **16**, 805–812  
509 (2018).
- 510 3. Ponte-Sucre, A. *et al.* Drug resistance and treatment failure in leishmaniasis: A 21st  
511 century challenge. *PLoS Negl. Trop. Dis.* **11**, (2017).
- 512 4. Basselin, M., Denise, H., Coombs, G. H. & Barrett, M. P. Resistance to pentamidine in

- 513 Leishmania mexicana involves exclusion of the drug from the mitochondrion.  
514 *Antimicrob. Agents Chemother.* **46**, 3731–3738 (2002).
- 515 5. Hassan, M. M. *et al.* Insecticide resistance in the sand fly, *Phlebotomus papatasi* from  
516 Khartoum State, Sudan. *Parasit. Vectors* **5**, 46 (2012).
- 517 6. Dhiman, R. C. & Yadav, R. S. Insecticide resistance in phlebotomine sandflies in  
518 Southeast Asia with emphasis on the Indian subcontinent. *Infect. Dis. Poverty* **5**, 106  
519 (2016).
- 520 7. Fawaz, E. Y. *et al.* Pyrethroid insecticide resistance mechanisms in the adult  
521 *phlebotomus papatasi* (diptera: Psychodidae). *J. Med. Entomol.* **53**, 620–628 (2016).
- 522 8. Abrudan, J. *et al.* The characterization of the *Phlebotomus papatasi* transcriptome.  
523 *Insect Mol. Biol.* **22**, 211–232 (2013).
- 524 9. Dillon, R. J. & Lane, R. P. Influence of *Leishmania* infection on blood-meal digestion in  
525 the sandflies *Phlebotomus papatasi* and *P. langeroni*. *Parasitol. Res.* **79**, 492–496  
526 (1993).
- 527 10. Dostálová, A. *et al.* The midgut transcriptome of *Phlebotomus* (*Larrousius*)  
528 *perniciosus*, a vector of *Leishmania infantum*: comparison of sugar fed and blood fed  
529 sand flies. *BMC Genomics* **12**, 223 (2011).
- 530 11. Ramalho-Ortigão, M. *et al.* Exploring the midgut transcriptome of *Phlebotomus*  
531 *papatasi*: comparative analysis of expression profiles of sugar-fed, blood-fed and  
532 *Leishmania*-major-infected sandflies. *BMC Genomics* **8**, 300 (2007).
- 533 12. Sádlová, J. & Volf, P. Peritrophic matrix of *Phlebotomus duboscqi* and its kinetics  
534 during *Leishmania major* development. *Cell Tissue Res.* **337**, 313 (2009).
- 535 13. Wang, L., Sloan, M. A. & Ligoxygakis, P. Intestinal NF- $\kappa$ B and STAT signalling is  
536 important for uptake and clearance in a *Drosophila*-*Herpetomonas* interaction model.



- 537 *PLOS Genet.* **15**, e1007931 (2019).
- 538 14. Sloan, M. A. *et al.* Transcriptional and genomic parallels between the monoxenous  
539 parasite *Herpetomonas muscarum* and *Leishmania*. *PLOS Genet.* **15**, e1008452  
540 (2019).
- 541 15. Inbar, E. *et al.* The Transcriptome of *Leishmania* major Developmental Stages in Their  
542 Natural Sand Fly Vector. *mBio* **8**, (2017).
- 543 16. Dostálová, A. & Volf, P. *Leishmania* development in sand flies: parasite-vector  
544 interactions overview. *Parasit. Vectors* **5**, 276 (2012).
- 545 17. Giraldo-Calderón, G. I. *et al.* VectorBase: an updated bioinformatics resource for  
546 invertebrate vectors and other organisms related with human diseases. *Nucleic Acids*  
547 *Res.* **43**, D707–D713 (2015).
- 548 18. Robinson, J. T. *et al.* Integrative genomics viewer. *Nat. Biotechnol.* **29**, 24–26 (2011).
- 549 19. Bonizzoni, M. *et al.* RNA-seq analyses of blood-induced changes in gene expression in  
550 the mosquito vector species, *Aedes aegypti*. *BMC Genomics* **12**, 82 (2011).
- 551 20. Marinotti, O. *et al.* Genome-wide analysis of gene expression in adult *Anopheles*  
552 *gambiae*. *Insect Mol. Biol.* **15**, 1–12 (2006).
- 553 21. Greenberg, L. & Hatini, V. Systematic expression and loss-of-function analysis defines  
554 spatially restricted requirements for *Drosophila* RhoGEFs and RhoGAPs in leg  
555 morphogenesis. *Mech. Dev.* **128**, 5–17 (2011).
- 556 22. Kim, S. H. *et al.* *Drosophila* TRPA1 channel mediates chemical  
557 avoidance in gustatory receptor neurons. *Proc. Natl. Acad. Sci.* **107**, 8440 LP-8445  
558 (2010).
- 559 23. Hamada, F. N. *et al.* An internal thermal sensor controlling temperature preference in  
560 *Drosophila*. *Nature* **454**, 217–220 (2008).

- 561 24. Du, E. J. *et al.* TrpA1 Regulates Defecation of Food-Borne Pathogens under the  
562 Control of the Duox Pathway. *PLoS Genet.* **12**, e1005773 (2016).
- 563 25. Pruzinova, K. *et al.* Comparison of Bloodmeal Digestion and the Peritrophic Matrix in  
564 Four Sand Fly Species Differing in Susceptibility to *Leishmania donovani*. *PLoS One* **10**,  
565 e0128203 (2015).
- 566 26. Ramalho-Ortigao, M., Kamhawi, S., Rowton, E., Ribeiro, J. M. C. & Valenzuela, J.  
567 Cloning and characterization of trypsin and chymotrypsin-like proteases from the  
568 midgut of the sandfly vector *Phlebotomus papatasi*. *Insect Biochem. Mol. Biol.* **33**,  
569 163–171 (2003).
- 570 27. Buchon, N. *et al.* A single modular serine protease integrates signals from pattern-  
571 recognition receptors upstream of the *Drosophila* Toll pathway. *Proc. Natl. Acad. Sci.*  
572 **106**, 12442–12447 (2009).
- 573 28. An, C., Zhang, M., Chu, Y. & Zhao, Z. Serine protease MP2 activates prophenoloxidase  
574 in the melanization immune response of *Drosophila melanogaster*. *PLoS One* **8**,  
575 e79533–e79533 (2013).
- 576 29. Yassine, H., Kamareddine, L., Chamat, S., Christophides, G. K. & Osta, M. A. A serine  
577 protease homolog negatively regulates TEP1 consumption in systemic infections of  
578 the malaria vector *Anopheles gambiae*. *J. Innate Immun.* **6**, 806–818 (2014).
- 579 30. Kan, H. *et al.* Molecular Control of Phenoloxidase-induced Melanin Synthesis in an  
580 Insect. *J. Biol. Chem.* **283**, 25316–25323 (2008).
- 581 31. Coutinho-Abreu, I. V, Sharma, N. K., Robles-Murguía, M. & Ramalho-Ortigao, M.  
582 Characterization of *Phlebotomus papatasi* Peritrophins, and the Role of PpPer1 in  
583 *Leishmania major* Survival in its Natural Vector. *PLoS Negl. Trop. Dis.* **7**, e2132 (2013).
- 584 32. Jochim, R. C. *et al.* The midgut transcriptome of *Lutzomyia longipalpis*: comparative

- 585 analysis of cDNA libraries from sugar-fed, blood-fed, post-digested and *Leishmania*  
586 *infantum chagasi*-infected sand flies. *BMC Genomics* **9**, 15 (2008).
- 587 33. Javed, M. A., Coutu, C., Theilmann, D. A., Erlandson, M. A. & Hegedus, D. D.  
588 Proteomics analysis of *Trichoplusia ni* midgut epithelial cell brush border membrane  
589 vesicles. *Insect Sci.* **26**, 424–440 (2019).
- 590 34. Telleria, E. L. *et al.* Caspar-like Gene Depletion Reduces *Leishmania* Infection in Sand  
591 Fly Host *Lutzomyia longipalpis*. *J. Biol. Chem.* **287**, 12985–12993 (2012).
- 592 35. Tinoco-Nunes, B. *et al.* The sandfly *Lutzomyia longipalpis* LL5 embryonic cell line has  
593 active Toll and Imd pathways and shows immune responses to bacteria, yeast and  
594 *Leishmania*. *Parasit. Vectors* **9**, 222 (2016).
- 595 36. Boulanger, N., Bulet, P. & Lowenberger, C. Antimicrobial peptides in the interactions  
596 between insects and flagellate parasites. *Trends Parasitol.* **22**, 262–268 (2006).
- 597 37. Boulanger, N. *et al.* Characterization of a defensin from the sand fly *Phlebotomus*  
598 *duboscqi* induced by challenge with bacteria or the protozoan parasite *Leishmania*  
599 *major*. *Infect. Immun.* **72**, 7140–7146 (2004).
- 600 38. Hu, C. & Aksoy, S. Innate immune responses regulate trypanosome parasite infection  
601 of the tsetse fly *Glossina morsitans morsitans*. *Mol. Microbiol.* **60**, 1194–1204 (2006).
- 602 39. Ha, E.-M. *et al.* Regulation of DUOX by the Gαq-phospholipase Cβ-Ca<sup>2+</sup> pathway in  
603 *Drosophila* gut immunity. *Dev. Cell* **16**, 386–397 (2009).
- 604 40. Myllymaki, H. & Ramet, M. JAK/STAT pathway in *Drosophila* immunity. *Scand. J.*  
605 *Immunol.* **79**, 377–385 (2014).
- 606 41. Benoit, J. B. & Denlinger, D. L. Bugs battle stress from hot blood. *Elife* **6**, e33035  
607 (2017).
- 608 42. Lehane, M. J., Lehane, M. J. & Lehane, M. J. *The biology of blood-sucking in insects.*

- 609 (Cambridge University Press, 2005).
- 610 43. Beyenbach, K. W. & Piermarini, P. M. Transcellular and paracellular pathways of  
611 transepithelial fluid secretion in Malpighian (renal) tubules of the yellow fever  
612 mosquito *Aedes aegypti*. *Acta Physiol.* **202**, 387–407 (2011).
- 613 44. Sterkel, M., Oliveira, J. H. M., Bottino-Rojas, V., Paiva-Silva, G. O. & Oliveira, P. L. The  
614 dose makes the poison: nutritional overload determines the life traits of blood-  
615 feeding arthropods. *Trends Parasitol.* **33**, 633–644 (2017).
- 616 45. Wang, Y., Gilbreath III, T. M., Kukutla, P., Yan, G. & Xu, J. Dynamic gut microbiome  
617 across life history of the malaria mosquito *Anopheles gambiae* in Kenya. *PLoS One* **6**,  
618 e24767 (2011).
- 619 46. Volf, P., Kiewegova, A. & Nemeč, A. Bacterial colonisation in the gut of *Phlebotomus*  
620 *duboseqi* (Diptera: Psychodidae): transtadial passage and the role of female diet.  
621 *Folia Parasitol. (Praha)*. **49**, 73–77 (2002).
- 622 47. Lahondere, C. *et al.* Countercurrent heat exchange and thermoregulation during  
623 blood-feeding in kissing bugs. *Elife* **6**, e26107 (2017).
- 624 48. Lahondère, C. & Lazzari, C. R. Thermal effect of blood feeding in the telmophagous fly  
625 *Glossina morsitans morsitans*. *J. Therm. Biol.* **48**, 45–50 (2015).
- 626 49. Upton, L. M., Povelones, M. & Christophides, G. K. *Anopheles gambiae* blood feeding  
627 initiates an anticipatory defense response to *Plasmodium berghei*. *J. Innate Immun.* **7**,  
628 74–86 (2015).
- 629 50. Kelly, P. H. *et al.* The Gut Microbiome of the Vector *Lutzomyia*  
630 *longipalpis*: Is Essential for Survival of *Leishmania*  
631 *infantum*. *MBio* **8**, e01121-16 (2017).
- 632 51. Volf, P. & Volfova, V. Establishment and maintenance of sand fly colonies. *J. Vector*

- 633 *Ecol.* **36 Suppl 1**, S1-9 (2011).
- 634 52. Kim, D., Langmead, B. & Salzberg, S. L. HISAT: a fast spliced aligner with low memory  
635 requirements. *Nat. Methods* **12**, 357 (2015).
- 636 53. Trapnell, C. *et al.* Differential gene and transcript expression analysis of RNA-seq  
637 experiments with TopHat and Cufflinks. *Nat. Protoc.* **7**, 562 (2012).
- 638 54. Liao, Y., Smyth, G. K. & Shi, W. featureCounts: an efficient general purpose program  
639 for assigning sequence reads to genomic features. *Bioinformatics* **30**, 923–930  
640 (2014).
- 641 55. Love, M. I., Huber, W. & Anders, S. Moderated estimation of fold change and  
642 dispersion for RNA-seq data with DESeq2. *Genome Biol.* **15**, 550 (2014).
- 643
- 644
- 645
- 646
- 647
- 648
- 649
- 650
- 651
- 652
- 653
- 654
- 655
- 656

657 **Figures**

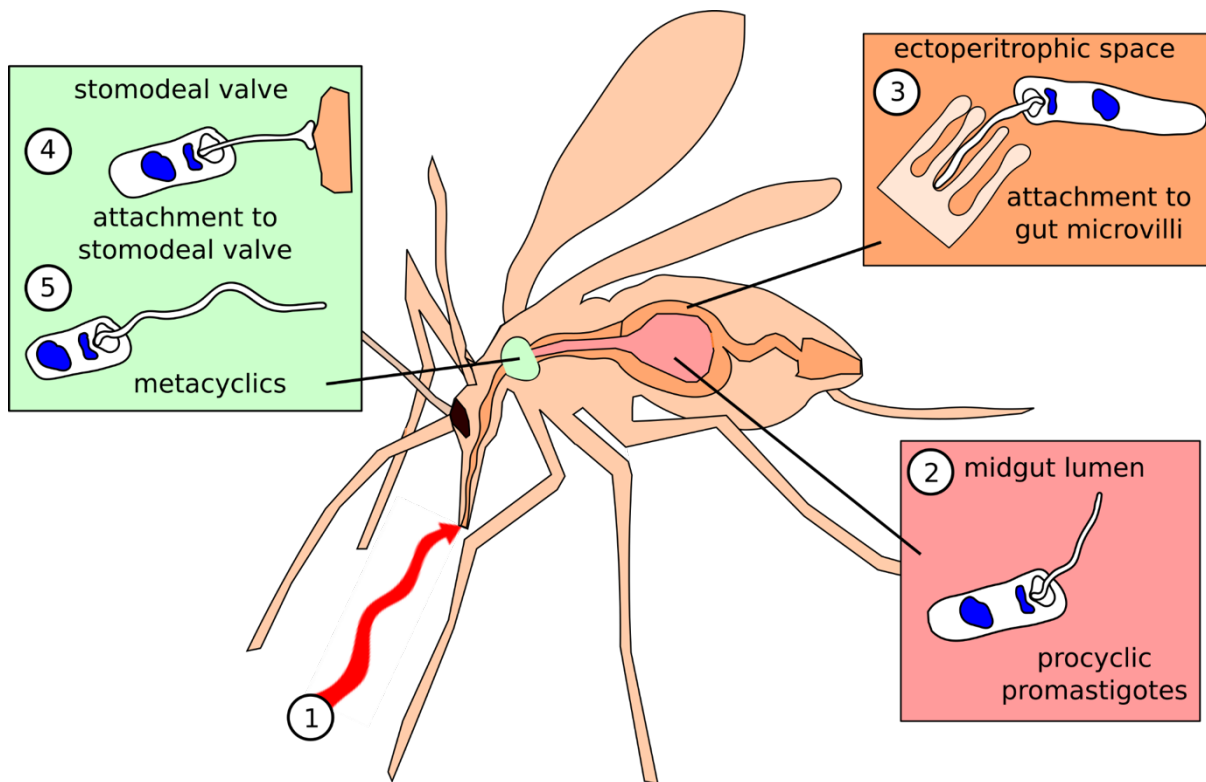

658

659

660 **Figure 1 – Schematic of the 3 major *Leishmania* stages in sand flies.** Shortly after ingestion

661 (1) of the blood meal promastigotes are localized in the midgut lumen, in the bloodmeal

662 bolus surrounded by peritrophic matrix (2, 1 day post blood meal (PBM)). *Leishmania* wait

663 until the PM is broken at the end of digestion, they enter the endoperitrophic space and

664 attach to the epithelial wall (3) (> 4 days PBM). Finally, where parasites have migrated

665 anteriorly to the thoracic midgut and the stomodeal valve of the fly and the human-infective

666 metacyclic forms differentiate from the earlier stages (4/5, > 9 days PBM).

667

668

669

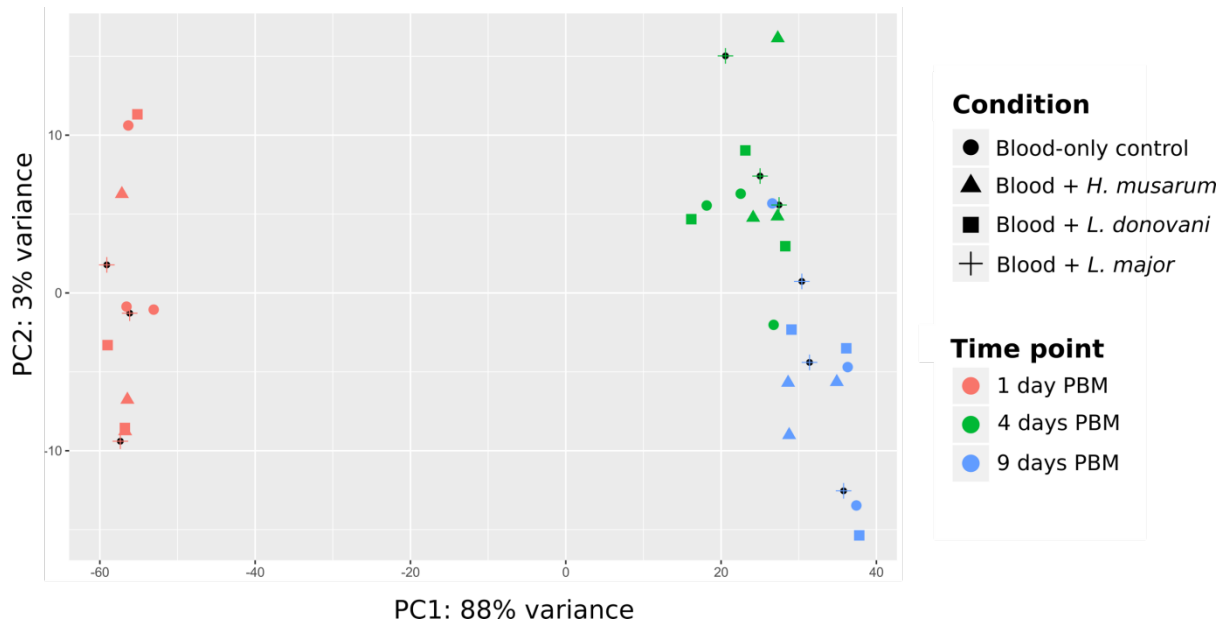

670

671 **Figure 2 – Principal component analysis shows that time was the major source of**

672 **variation, not infection status (condition).**

673

674

675

676

677

678

679

680

681

682

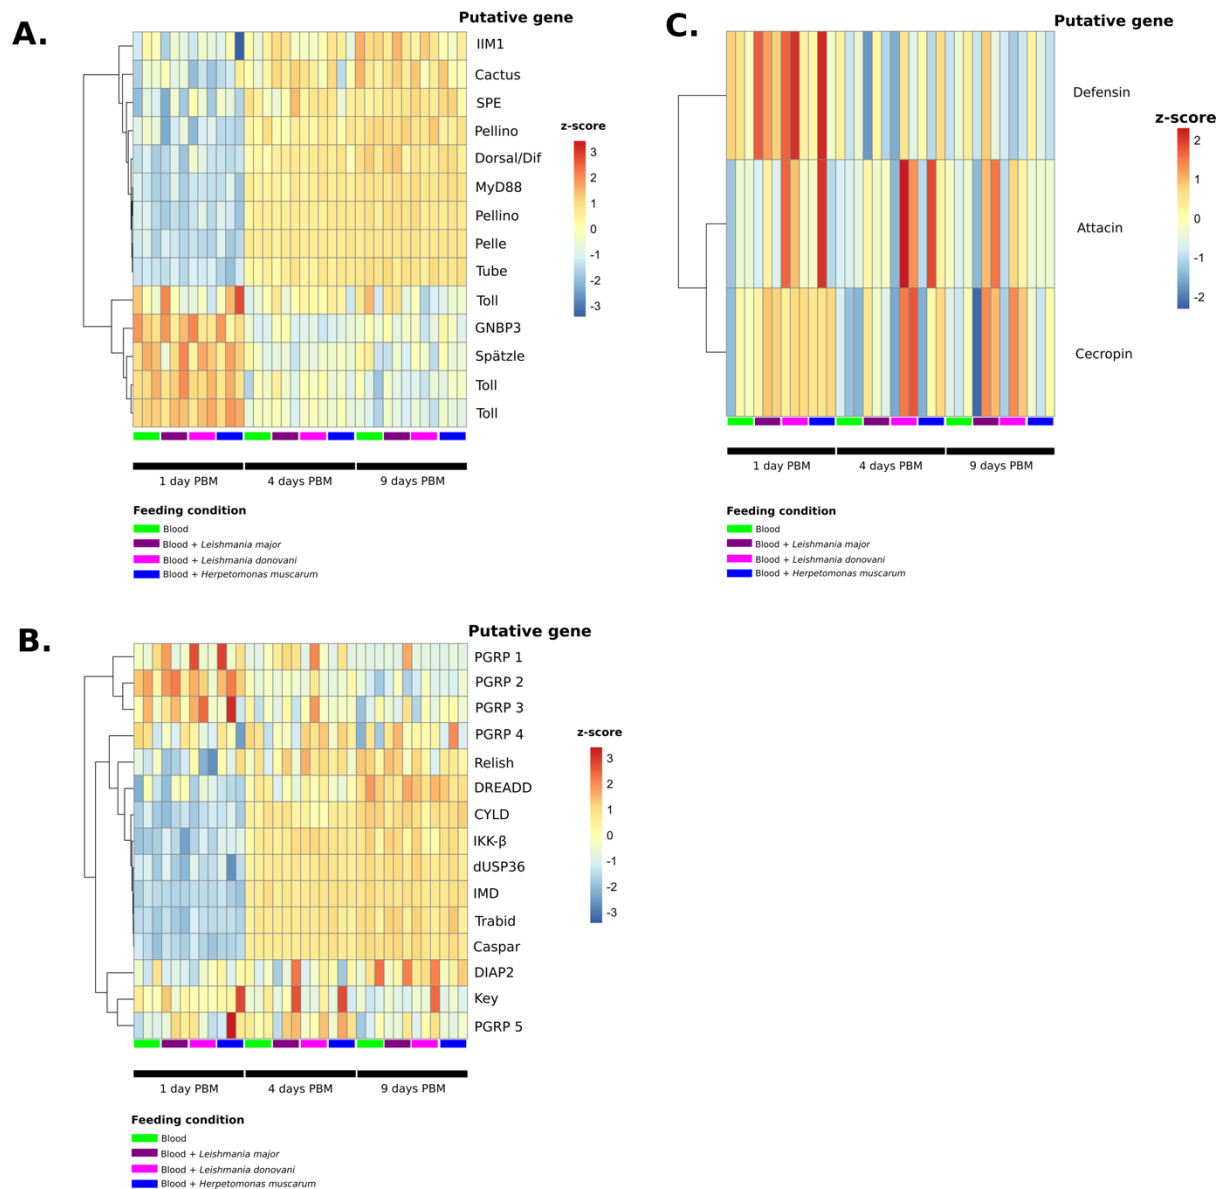

683

684

685 **Figure 3 – Transcription of genes from the two major innate immune pathways in *P.***

686 ***papatasi* across samples. A.** A heatmap of z-scores (based on log transformed, normalised

687 counts data) for Toll pathway genes across samples. **B.** A heatmap of z-scores (based on log

688 transformed, normalised counts data) for Imd pathway genes across samples. **C.** A heatmap

689 of z-scores (based on log transformed, normalised counts data) for anti-microbial peptide

690 genes across samples.

691



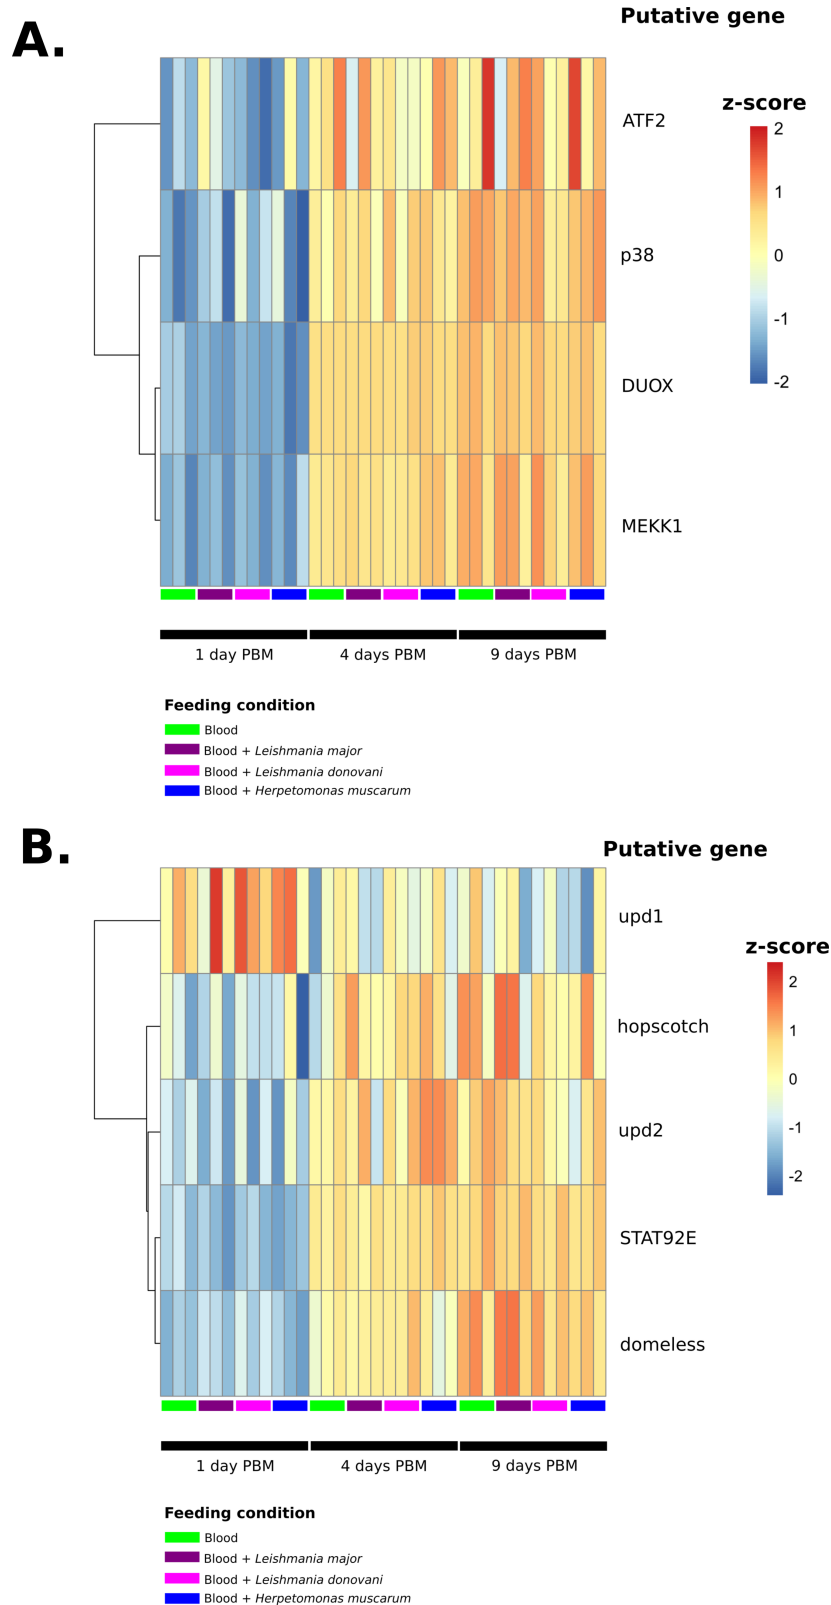

692

693 **Figure 4 – Transcription of genes from the DUOX (A) and JAK-STAT signalling pathways in**

694 ***P. papatasi* across samples.** Heatmaps of z-scores (based on log transformed, normalised

695 counts data) across samples.

696 **Supplementary figures**

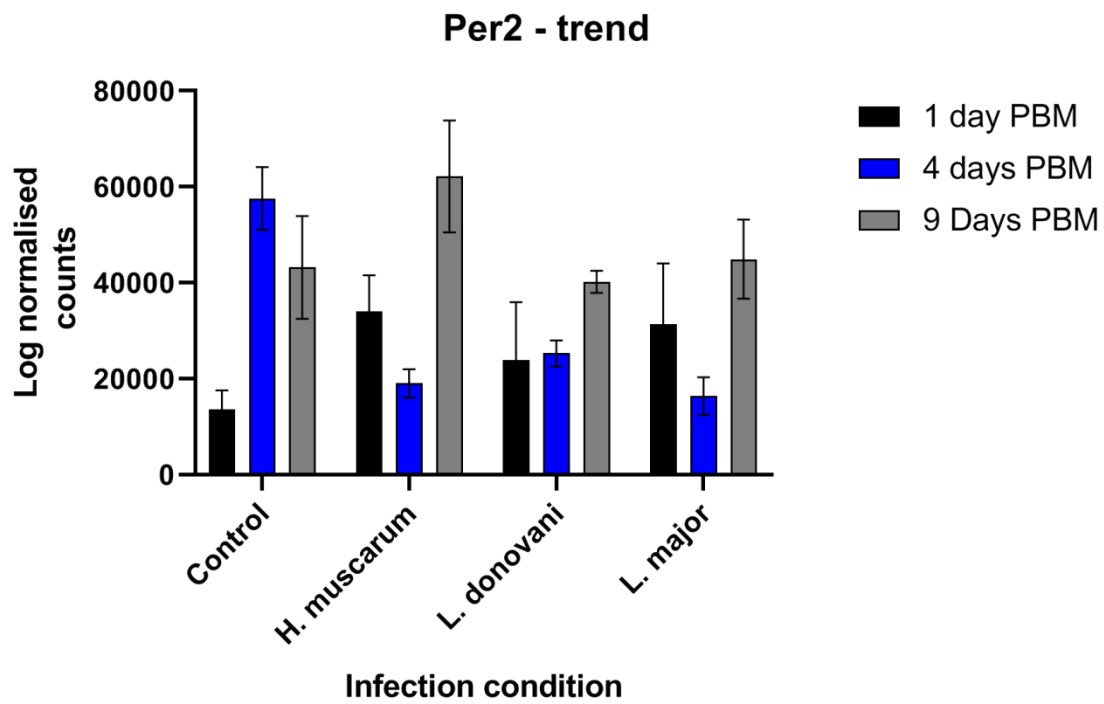

697

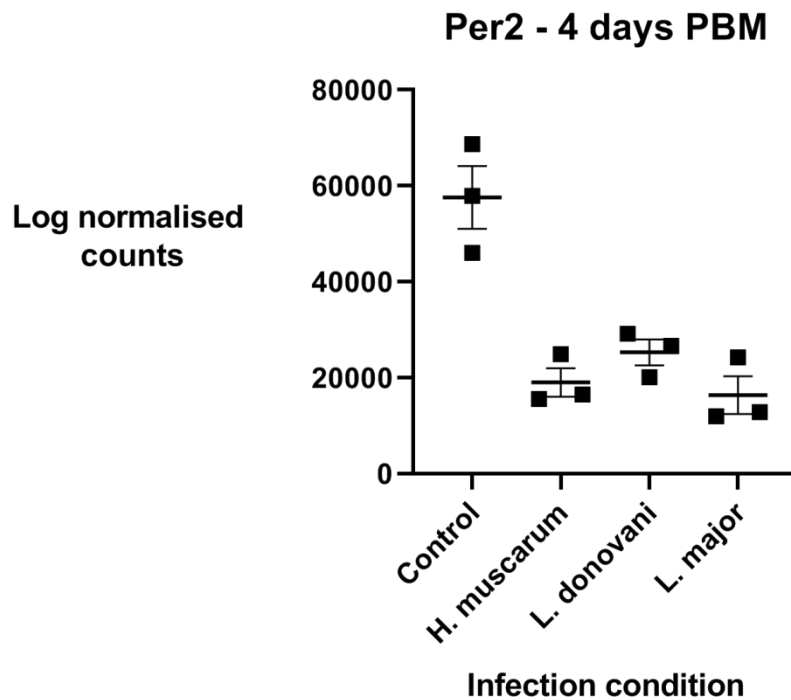

698

699 **Figure S1 – Log normalised transcript counts for Peritrophin 2 (Per2) in *P. papatasi***

700 **throughout infection.** Error bars show the standard error of the mean.

## 701 **List of Supplementary Tables**

702

703 **Table S1 – Read mapping summaries.** This table shows the read mapping information for  
704 each sample e.g. number of reads, percentage of read mapped etc.

705

706 **Table S2 – Transcripts associated with trypanosomatid presence in the blood meal.** This  
707 table shows the fold changes and differential regulation statistics (including p-values) for  
708 transcripts whose abundance differed between trypanosomatid fed flies and blood-fed  
709 control flies.

710

711 **Table S3 – Transcripts associated with specific trypanosomatids in the blood meal.** This  
712 table shows the fold changes and differential regulation statistics (including p-values) for  
713 transcripts whose abundance differed between trypanosomatid infections.

714

715 **Table S4 – Transcripts significantly differentially regulated between 1 day and 4 days post**  
716 **bloodmeal (blood-only) in *P. papatasi*.**

717

718 **Table S5 – Transcripts significantly differentially regulated between 4 day and 9 days post**  
719 **bloodmeal (blood-only) in *P. papatasi*.**

720

721 **Table S6 – Transcripts of interest which are differentially regulated between 1 day and 4**  
722 **days post bloodmeal (blood-only) in *P. papatasi*.** This is a streamlined version of  
723 supplementary table 4 showing transcripts of interest discussed in the text.

724 **Table S7 – Transcripts of interest which are differentially regulated between 4 days and 9**

725 **days post bloodmeal (blood-only) in *P. papatasi*.** This is a streamlined version of

726 supplementary table 4 showing transcripts of interest discussed in the text.

727

728 **Table S8 – Differential regulation statistics for transcripts of dipteran immune pathways of**

729 **interest (Toll, Imd, DUOX and JAK-STAT) across samples. ns – not significantly differentially**

730 regulated.

731

732

### 733 **List of supplementary data files**

734 **Annotation file for *de novo* assembled transcripts merged with Ppal1 annotation (.gtf)**

735 **Assembled transcript sequences (.fasta)**
